# Supplementary material for: New Mitogenomes of the Green Lacewing Tribe Ankylopterygini (Neuroptera: Chrysopidae: Chrysopinae) and Phylogenetic Implications of Chrysopidae
Source: MDPI journal article supplement (doi:10.3390/insects14110878), 2023-11-14
Supplement: s1 [file s1]

Table S1. List of taxonomic groups used for the phylogenetic analyses in this study.

| Family         | Species                          | Accession number | Reference  |
|----------------|----------------------------------|------------------|------------|
| Chrysopidae    | <i>Abachrysa eureka</i>          | KY587199         | [13]       |
|                | <i>Ankylopteryx gracilis</i>     | OQ269716         | This study |
|                | <i>Ankylopteryx octopunctata</i> | OM510943         | This study |
|                | <i>Apochrysa matsumurae</i>      | NC_015095        | [30]       |
|                | <i>Chrysopa pallens</i>          | NC_019618        | [31]       |
|                | <i>Chrysoperla externa</i>       | NC_030341        |            |
|                | <i>Chrysoperla nipponensis</i>   | NC_015093        | [30]       |
|                | <i>Italochrysa insignis</i>      | KY587200         | [13]       |
|                | <i>Leucochrysa pretiosa</i>      | KY587201         | [13]       |
|                | <i>Nothancyla verreauxi</i>      | KP264629         | [13]       |
|                | <i>Nothochrysa sinica</i>        | NC_060341        | [12]       |
|                | <i>Nothochrysa</i> sp.           | KP264630         |            |
|                | <i>Parankylopteryx</i> sp.       | KY587202         | [13]       |
| Hemerobiidae   | <i>Neuronema laminatum</i>       | NC_028153        | [32]       |
|                | <i>Micromus angulatus</i>        | NC_042677        | [33]       |
| Mantispidae    | <i>Ditaxis biseriata</i>         | NC_013257        | [34]       |
|                | <i>Mantispa japonica</i>         | NC_039771        | [35]       |
| Myrmeleontidae | <i>Layahima yangi</i>            | NC_071191        |            |
|                | <i>Myrmeleon formicarius</i>     | NC_047285        | [36]       |

## References

- Jiang, Y.; Garzón-Orduña, I.J.; Winterton, S.L.; Yang, F.; Liu, X. Phylogenetic relationships among tribes of the green lacewing subfamily Chrysopinae recovered based on mitochondrial phylogenomics. *Sci. Rep.* **2017**, *7*, 7218. <https://doi.org/10.1038/s41598-017-07431-1>.
- Haruyama, N.; Mochizuki, A.; Sato, Y.; Naka, H.; Nomura, M. Complete mitochondrial genomes of two green lacewings, *Chrysoperla nipponensis* (Okamoto, 1914) and *Apochrysa matsumurae* Okamoto, 1912 (Neuroptera: Chrysopidae). *Mol. Biol. Rep.* **2011**, *38*, 3367–3373, doi:10.1007/s11033-010-0444-0.
- He, K.; Chen, Z.; Yu, D.N.; Zhang, J.Y. The complete mitochondrial genome of *Chrysopa pallens* (Insecta, Neuroptera, Chrysopidae). *Mitochondrial DNA* **2012**, *23*, 373–375, doi:10.3109/19401736.2012.696631.
- Zhang, R.Y.; Ma, Y.L.; Fan, F.; Geng, S.; Wang, Y.Y.; Liu, X.Y. The complete mitochondrial genome of *Nothochrysa sinica* (Neuroptera: Chrysopidae: Nothochrysinae) with a phylogenetic analysis of Chrysopoidea. *Mitochondrial DNA Part B* **2021**, *6*, 1632–1633. <https://doi.org/10.1080/23802359.2021.1926361>.
- Zhao, Y.; Chen, Y.J.; Zhao, J.; Liu, Z.Q. First complete mitochondrial genome from the brown lacewings (Neuroptera: Hemerobiidae). *Mitochondrial DNA Part A* **2016**, *27*, 2763–2764, doi:10.3109/19401736.2015.1053054.
- Park, J.; Park, J.; Kim, J.H.; Cho, J.R.; Kim, Y.; Seo, B.Y. The complete mitochondrial genome of *Micromus angulatus* (Stephens, 1836) (Neuroptera: Hemerobiidae). *Mitochondrial DNA Part B* **2019**, *4*, 1467–1469, doi:10.1080/23802359.2019.1598800.
- Cameron, S.L.; Sullivan, J.; Song, H.; Miller, K.B.; Whiting, M.F. A mitochondrial genome phylogeny of the Neuropterida (lace-wings, alderflies and snakeflies) and their relationship to the other holometabolous insect orders. *Zool. Scr.* **2009**, *38*, 575–590, doi:10.1111/j.1463-6409.2009.00392.x.

8. Chen, T.; Lan, X.E.; Chen, X.N.; You, P. Studies on complete mitochondrial genomes and Neuroptera phylogenesis of three Mantispidae. *Journal of Shaanxi Normal University* **2017**, *46*, 81-92.
9. Wu, J.Q.; Wang, S.Z.; Yang, X.Z.; Guo, Y.J.; Weng, X.Q.; Wu, S.Q. The complete mitochondrial genome of *Myrmeleon formicarius* (Neuroptera: Myrmeleontidae). *Mitochondrial DNA Part B* **2020**, *5*, 1798-1799, doi:10.1080/23802359.2020.1750977.

Table S2. Organization of *Ankylopteryx gracilis* mitogenome.

| Gene         | Direction | Location |      | Size | Anticodon | Codon |        | Intergenic<br>nucleotides |
|--------------|-----------|----------|------|------|-----------|-------|--------|---------------------------|
|              |           | Start    | End  |      |           | Start | Stop   |                           |
| <i>trnI</i>  | J         | 1        | 69   | 69   | GAT       |       |        | 136                       |
| <i>trnQ</i>  | N         | 274      | 206  | 69   | TTG       |       |        | 2                         |
| <i>trnM</i>  | J         | 277      | 344  | 68   | CAT       |       |        | 0                         |
| <i>nad2</i>  | J         | 345      | 1353 | 1009 |           | ATT   | T-tRNA | 0                         |
| <i>trnC</i>  | N         | 1416     | 1354 | 63   | GCA       |       |        | 3                         |
| <i>trnW</i>  | J         | 1420     | 1484 | 65   | TCA       |       |        | 1                         |
| <i>trnY</i>  | N         | 1549     | 1486 | 64   | GTA       |       |        | 3                         |
| <i>cox1</i>  | J         | 1553     | 3086 | 1534 |           | TCG   | T-tRNA | 0                         |
| <i>trnL2</i> | J         | 3087     | 3150 | 64   | TAA       |       |        | 4                         |
| <i>cox2</i>  | J         | 3155     | 3838 | 684  |           | ATG   | TAA    | 2                         |
| <i>trnK</i>  | J         | 3841     | 3910 | 70   | CTT       |       |        | 0                         |
| <i>trnD</i>  | J         | 3911     | 3975 | 65   | GTC       |       |        | 0                         |
| <i>atp8</i>  | J         | 3976     | 4134 | 159  |           | ATT   | TAA    | -7                        |
| <i>atp6</i>  | J         | 4128     | 4805 | 678  |           | ATG   | TAA    | -1                        |
| <i>cox3</i>  | J         | 4805     | 5593 | 789  |           | ATG   | TAA    | 2                         |
| <i>trnG</i>  | J         | 5596     | 5660 | 65   | TCC       |       |        | 0                         |
| <i>nad3</i>  | J         | 5661     | 6012 | 352  |           | ATT   | T-tRNA | 0                         |
| <i>trnA</i>  | J         | 6013     | 6078 | 66   | TGC       |       |        | 0                         |
| <i>trnR</i>  | J         | 6079     | 6140 | 62   | TCG       |       |        | 0                         |
| <i>trnN</i>  | J         | 6141     | 6208 | 68   | GTT       |       |        | 0                         |
| <i>trnS1</i> | J         | 6209     | 6275 | 67   | TTC       |       |        | 1                         |

|                |   |       |       |      |     |     |         |    |
|----------------|---|-------|-------|------|-----|-----|---------|----|
| <i>trnE</i>    | J | 6277  | 6340  | 64   | TTC |     |         | -2 |
| <i>trnF</i>    | N | 6404  | 6339  | 66   | GAA |     |         | 0  |
| <i>nad5</i>    | N | 8130  | 6405  | 1726 |     | ATT | T-tRNA  | 0  |
| <i>trnH</i>    | N | 8193  | 8131  | 63   | GTG |     |         | 0  |
| <i>nad4</i>    | N | 9530  | 8194  | 1337 |     | ATG | TA-tRNA | -7 |
| <i>nad4L</i>   | N | 9820  | 9524  | 297  |     | ATG | TAA     | 2  |
| <i>trnT</i>    | J | 9823  | 9886  | 64   | TGT |     |         | 0  |
| <i>trnP</i>    | N | 9952  | 9887  | 66   | TGG |     |         | 2  |
| <i>nad6</i>    | J | 9955  | 10464 | 510  |     | ATT | TAA     | -1 |
| <i>cob</i>     | J | 10464 | 11598 | 1135 |     | ATG | T-tRNA  | 0  |
| <i>trnS2</i>   | J | 11599 | 11665 | 67   | TGA |     |         | 24 |
| <i>nad1</i>    | N | 12628 | 11690 | 939  |     | ATA | TAA     | 13 |
| <i>trnL1</i>   | N | 12704 | 12642 | 63   | TAG |     |         | 0  |
| <i>rrnL</i>    | N | 14023 | 12705 | 1319 |     |     |         | 0  |
| <i>trnV</i>    | N | 14093 | 14024 | 70   | TAC |     |         | 0  |
| <i>rrnS</i>    | N | 14868 | 14094 | 775  |     |     |         | 0  |
| Control region |   | 14869 | 18284 | 3416 |     |     |         |    |

Table S3. Organization of *Ankylopteryx octopunctata* mitogenome.

| Gene         | Direction | Location |      | Size | Anticodon | Codon |        | Intergenic<br>nucleotides |
|--------------|-----------|----------|------|------|-----------|-------|--------|---------------------------|
|              |           | Start    | End  |      |           | Start | Stop   |                           |
| <i>trnI</i>  | J         | 328      | 394  | 67   | GAT       |       |        | 137                       |
| <i>trnQ</i>  | N         | 600      | 532  | 69   | TTG       |       |        | 2                         |
| <i>trnM</i>  | J         | 603      | 670  | 68   | CAT       |       |        | 0                         |
| <i>nad2</i>  | J         | 671      | 1679 | 1009 |           | ATT   | T-tRNA | 0                         |
| <i>trnC</i>  | N         | 1743     | 1680 | 64   | GCA       |       |        | 1                         |
| <i>trnW</i>  | J         | 1745     | 1808 | 64   | TCA       |       |        | 1                         |
| <i>trnY</i>  | N         | 1874     | 1810 | 65   | GTA       |       |        | 2                         |
| <i>cox1</i>  | J         | 1877     | 3410 | 1534 |           | TCG   | T-tRNA | 0                         |
| <i>trnL2</i> | J         | 3411     | 3474 | 64   | TAA       |       |        | 3                         |
| <i>cox2</i>  | J         | 3478     | 4159 | 682  |           | ATG   | T-tRNA | 0                         |
| <i>trnK</i>  | J         | 4160     | 4230 | 71   | CTT       |       |        | -1                        |
| <i>trnD</i>  | J         | 4230     | 4295 | 66   | GTC       |       |        | 0                         |
| <i>atp8</i>  | J         | 4296     | 4454 | 159  |           | ATC   | TAA    | -7                        |
| <i>atp6</i>  | J         | 4448     | 5125 | 678  |           | ATG   | TAA    | -1                        |
| <i>cox3</i>  | J         | 5125     | 5913 | 789  |           | ATG   | TAG    | 3                         |
| <i>trnG</i>  | J         | 5917     | 5981 | 65   | TCC       |       |        | 0                         |
| <i>nad3</i>  | J         | 5982     | 6333 | 352  |           | ATT   | T-tRNA | 0                         |
| <i>trnA</i>  | J         | 6334     | 6399 | 66   | TGC       |       |        | -1                        |
| <i>trnR</i>  | J         | 6399     | 6462 | 64   | TCG       |       |        | 3                         |
| <i>trnN</i>  | J         | 6466     | 6531 | 66   | GTT       |       |        | 0                         |
| <i>trnS1</i> | J         | 6532     | 6598 | 67   | TTC       |       |        | 8                         |

|              |   |       |       |      |     |     |         |    |
|--------------|---|-------|-------|------|-----|-----|---------|----|
| <i>trnE</i>  | J | 6607  | 6671  | 65   | TTC |     |         | -2 |
| <i>trnF</i>  | N | 6732  | 6670  | 63   | GAA |     |         | 0  |
| <i>nad5</i>  | N | 8458  | 6733  | 1726 |     | ATT | T-tRNA  | 0  |
| <i>trnH</i>  | N | 8521  | 8459  | 63   | GTG |     |         | 0  |
| <i>nad4</i>  | N | 9855  | 8522  | 1334 |     | ATG | TA-tRNA | -7 |
| <i>nad4L</i> | N | 10145 | 9849  | 297  |     | ATG | TAA     | 2  |
| <i>trnT</i>  | J | 10148 | 10211 | 64   | TGT |     |         | 0  |
| <i>trnP</i>  | N | 10277 | 10212 | 66   | TGG |     |         | 1  |
| <i>nad6</i>  | J | 10279 | 10788 | 510  |     | ATT | TAA     | -1 |
| <i>cob</i>   | J | 10788 | 11922 | 1135 |     | ATG | T-tRNA  | 0  |
| <i>trnS2</i> | J | 11923 | 11989 | 67   | TGA |     |         | 30 |
| <i>nad1</i>  | N | 12949 | 12020 | 930  |     | ATA | TAA     | 22 |
| <i>trnL1</i> | N | 13034 | 12972 | 63   | TAG |     |         |    |

Table S4. Nucleotide composition and skews in the complete mitogenomes of Chrysopidae.

| Species                        | T(U)  | C     | A     | G    | Total   | A+T%  | AT-Skew | GC-Skew |
|--------------------------------|-------|-------|-------|------|---------|-------|---------|---------|
| <i>Ankylopteryx gracilis</i>   | 41.05 | 10.70 | 40.69 | 7.56 | 18284.0 | 81.75 | 0.00    | -0.17   |
| <i>Apochrysa matsumurae</i>    | 40.95 | 12.36 | 38.07 | 8.62 | 16214.0 | 79.02 | -0.04   | -0.18   |
| <i>Chrysopa pallens</i>        | 39.63 | 11.71 | 39.92 | 8.74 | 16723.0 | 79.54 | 0.00    | -0.15   |
| <i>Chrysoperla externa</i>     | 39.89 | 11.87 | 38.88 | 9.36 | 16509.0 | 78.76 | -0.01   | -0.12   |
| <i>Chrysoperla nipponensis</i> | 39.71 | 12.01 | 39.17 | 9.10 | 16057.0 | 78.89 | -0.01   | -0.14   |
| <i>Nothochrysa sinica</i>      | 41.26 | 11.48 | 38.64 | 8.62 | 16166.0 | 79.90 | -0.03   | -0.14   |

Table S5. Nucleotide composition and skews in the complete PCGs of Chrysopidae.

| Species                          | T(U) | C    | A    | G    | Total   | A+T%  | AT-Skew | GC-Skew |
|----------------------------------|------|------|------|------|---------|-------|---------|---------|
| <i>Abachrysa eureka</i>          | 45.6 | 9.8  | 33.8 | 10.8 | 11133.0 | 79.39 | -0.15   | 0.05    |
| <i>Ankylopteryx gracilis</i>     | 45.3 | 9.8  | 33.9 | 11.0 | 11145.0 | 79.19 | -0.15   | 0.06    |
| <i>Ankylopteryx octopunctata</i> | 45.1 | 10.1 | 33.7 | 11.1 | 11127.0 | 78.86 | -0.14   | 0.05    |
| <i>Apochrysa matsumurae</i>      | 44.2 | 10.7 | 33.3 | 11.8 | 11142.0 | 77.54 | -0.14   | 0.05    |
| <i>Chrysopa pallens</i>          | 44.6 | 10.4 | 33.5 | 11.5 | 11154.0 | 78.11 | -0.14   | 0.05    |
| <i>Chrysoperla externa</i>       | 45.3 | 10.4 | 31.7 | 12.6 | 11151.0 | 77.00 | -0.18   | 0.09    |
| <i>Chrysoperla nipponensis</i>   | 45.0 | 10.5 | 32.7 | 11.9 | 11151.0 | 77.66 | -0.16   | 0.06    |
| <i>Nothancyla verreauxi</i>      | 44.9 | 10.2 | 33.6 | 11.3 | 11132.0 | 78.49 | -0.14   | 0.05    |
| <i>Nothochrysa sinica</i>        | 44.6 | 10.4 | 33.6 | 11.3 | 11136.0 | 78.27 | -0.14   | 0.04    |
| <i>Nothochrysa</i> sp.           | 44.7 | 10.6 | 33.2 | 11.5 | 11145.0 | 77.94 | -0.15   | 0.04    |



Table S6. Nucleotide composition at the three codon sites in the complete PCGs of Chrysopidae.

| Species                          | T-1  | C-1  | A-1  | G-1  | T-2  | C-2  | A-2  | G-2  | T-3  | C-3 | A-3  | G-3 |
|----------------------------------|------|------|------|------|------|------|------|------|------|-----|------|-----|
| <i>Abachrysa eureka</i>          | 39.0 | 9.7  | 34.2 | 17.3 | 47.0 | 17.8 | 21.5 | 14.1 | 52.0 | 2.0 | 45.5 | 1.0 |
| <i>Ankylopteryx gracilis</i>     | 38.0 | 9.7  | 34.5 | 17.6 | 47.0 | 17.4 | 21.8 | 13.9 | 51.0 | 2.3 | 45.3 | 1.5 |
| <i>Ankylopteryx octopunctata</i> | 38.0 | 9.9  | 34.9 | 17.4 | 47.0 | 17.8 | 21.6 | 14.2 | 51.0 | 2.5 | 44.8 | 1.6 |
| <i>Apochrysa matsumurae</i>      | 38.0 | 10.6 | 33.3 | 18.3 | 46.0 | 18.4 | 21.1 | 14.2 | 49.0 | 3.0 | 45.4 | 2.8 |
| <i>Chrysopa pallens</i>          | 38.0 | 10.1 | 33.2 | 18.4 | 46.0 | 18.2 | 21.3 | 14.2 | 49.0 | 3.0 | 46.0 | 1.9 |
| <i>Chrysoperla externa</i>       | 39.0 | 10.0 | 32.5 | 18.9 | 46.0 | 18.6 | 21.3 | 14.2 | 51.0 | 2.8 | 41.3 | 4.6 |
| <i>Chrysoperla nipponensis</i>   | 39.0 | 9.9  | 32.2 | 19.3 | 46.0 | 18.7 | 21.0 | 14.4 | 51.0 | 2.8 | 44.7 | 1.9 |
| <i>Nothancyla verreauxi</i>      | 38.0 | 9.9  | 34.1 | 18.1 | 46.0 | 18.3 | 21.5 | 14.1 | 51.0 | 2.4 | 45.2 | 1.7 |
| <i>Nothochrysa sinica</i>        | 38.0 | 10.3 | 33.9 | 18.0 | 46.0 | 18.5 | 21.5 | 14.1 | 50.0 | 2.5 | 45.5 | 1.8 |
| <i>Nothochrysa</i> sp.           | 37.0 | 10.5 | 33.8 | 18.3 | 46.0 | 18.7 | 21.3 | 14.3 | 51.0 | 2.6 | 44.6 | 1.9 |

Table S7. Encoded amino acids composition in the complete PCGs of Chrysopidae.

| Species                          | Ala  | Cys  | Asp  | Glu  | Phe  | Gly  | His  | Ile   | Lys  | Leu   | Met  | Asn  | Pro  | Gln  | Arg  | Ser  | Thr  | Val  | Trp  | Tyr  |
|----------------------------------|------|------|------|------|------|------|------|-------|------|-------|------|------|------|------|------|------|------|------|------|------|
| <i>Abachrysa eureka</i>          | 4.11 | 1.00 | 1.78 | 2.05 | 8.89 | 5.46 | 1.97 | 10.86 | 2.35 | 16.10 | 6.94 | 6.19 | 3.43 | 1.89 | 1.54 | 9.00 | 4.65 | 3.94 | 2.76 | 5.11 |
| <i>Ankylopteryx gracilis</i>     | 4.02 | 0.92 | 1.67 | 2.10 | 8.76 | 5.50 | 2.00 | 11.00 | 2.32 | 15.97 | 6.93 | 6.47 | 3.43 | 1.81 | 1.51 | 8.79 | 4.53 | 4.29 | 2.72 | 5.26 |
| <i>Ankylopteryx octopunctata</i> | 4.08 | 1.05 | 1.84 | 2.00 | 8.64 | 5.48 | 2.00 | 10.99 | 2.38 | 15.74 | 7.16 | 6.10 | 3.38 | 1.84 | 1.54 | 8.91 | 4.86 | 4.05 | 2.67 | 5.29 |
| <i>Apochrysa matsumurae</i>      | 4.43 | 0.97 | 1.78 | 2.05 | 9.12 | 5.51 | 2.08 | 10.26 | 2.51 | 15.76 | 6.61 | 5.59 | 3.43 | 1.92 | 1.57 | 9.20 | 4.91 | 4.59 | 2.70 | 5.02 |
| <i>Chrysopa pallens</i>          | 4.34 | 1.00 | 1.91 | 2.08 | 8.95 | 5.55 | 2.00 | 10.51 | 2.37 | 16.10 | 6.39 | 5.88 | 3.50 | 1.78 | 1.54 | 9.09 | 4.69 | 4.53 | 2.72 | 5.07 |
| <i>Chrysoperla externa</i>       | 4.53 | 0.97 | 1.89 | 2.10 | 8.79 | 5.72 | 1.97 | 9.98  | 2.27 | 16.40 | 6.18 | 5.88 | 3.45 | 1.83 | 1.54 | 8.90 | 5.02 | 4.69 | 2.72 | 5.18 |
| <i>Chrysoperla nipponensis</i>   | 4.53 | 0.97 | 1.97 | 2.10 | 8.76 | 5.72 | 2.00 | 9.76  | 2.21 | 16.26 | 6.18 | 5.66 | 3.48 | 1.86 | 1.54 | 9.09 | 5.07 | 5.04 | 2.75 | 5.04 |
| <i>Nothancyla verreauxi</i>      | 4.43 | 1.03 | 1.84 | 2.05 | 8.65 | 5.59 | 1.97 | 10.38 | 2.43 | 15.89 | 7.08 | 6.05 | 3.46 | 1.81 | 1.49 | 8.78 | 4.94 | 4.24 | 2.73 | 5.16 |
| <i>Nothochrysa sinica</i>        | 4.32 | 0.97 | 1.84 | 2.13 | 8.51 | 5.59 | 1.94 | 10.80 | 2.46 | 15.91 | 6.62 | 5.97 | 3.54 | 1.81 | 1.54 | 9.07 | 4.89 | 4.21 | 2.73 | 5.16 |
| <i>Nothochrysa</i> sp.           | 4.35 | 0.94 | 1.86 | 2.11 | 8.53 | 5.59 | 1.94 | 10.53 | 2.48 | 15.90 | 6.45 | 5.72 | 3.54 | 1.84 | 1.54 | 9.23 | 5.16 | 4.40 | 2.73 | 5.18 |

Table S8. Start codons and stop codons of PCGs in Chrysopidae.

|                                  | <i>ATP6</i> | <i>ATP8</i> | <i>COX1</i> | <i>COX2</i> | <i>COX3</i> | <i>CYTB</i> | <i>ND1</i> | <i>ND2</i> | <i>ND3</i> | <i>ND4</i> | <i>ND4L</i> | <i>ND5</i> | <i>ND6</i> |
|----------------------------------|-------------|-------------|-------------|-------------|-------------|-------------|------------|------------|------------|------------|-------------|------------|------------|
| Start codon                      |             |             |             |             |             |             |            |            |            |            |             |            |            |
| <i>Abachrysa eureka</i>          | ATG         | ATT         | TCG         | ATG         | ATG         | ATG         | ATA        | ATT        | ATG        | ATG        | ATG         | ATT        | ATT        |
| <i>Ankylopteryx gracilis</i>     | ATG         | ATT         | TCG         | ATG         | ATG         | ATG         | ATA        | ATT        | ATT        | ATG        | ATG         | ATT        | ATT        |
| <i>Ankylopteryx octopunctata</i> | ATG         | ATC         | TCG         | ATG         | ATG         | ATG         | ATA        | ATT        | ATT        | ATG        | ATG         | ATT        | ATT        |
| <i>Apochrysa matsumurae</i>      | ATG         | ATT         | TCG         | ATG         | ATG         | ATG         | ATA        | ATT        | ATC        | ATG        | ATG         | ATA        | ATT        |
| <i>Chrysopa pallens</i>          | ATG         | ATT         | ATT         | ATG         | ATG         | ATG         | ATA        | ATT        | ATT        | ATG        | ATG         | ATT        | ATT        |
| <i>Chrysoperla externa</i>       | ATG         | ATG         | TCG         | ATG         | ATG         | ATG         | ATG        | ATG        | ATG        | ATG        | ATG         | ATG        | ATG        |
| <i>Chrysoperla nipponensis</i>   | ATG         | ATT         | TCG         | ATG         | ATG         | ATG         | ATG        | ATT        | ATT        | ATG        | ATG         | ATA        | ATT        |
| <i>Italochrysa insignis</i>      | ATG         | ATT         | TCG         | ATG         | ATG         | ATG         | ATA        |            | ATT        | ATG        | ATG         | ATT        | ATT        |
| <i>Leucochrysa pretiosa</i>      | ATG         | ATT         | TCG         | ATG         | ATG         | ATG         | ATA        |            | ATT        | ATG        | ATG         | ATT        | ATT        |
| <i>Nothancyla verreauxi</i>      | ATG         | ATT         | TCG         | ATG         | ATG         | ATG         | ATA        | ATT        | ATT        | ATG        | ATG         | ATT        | ATT        |
| <i>Nothochrysa sinica</i>        | ATG         | ATT         | TCG         | ATG         | ATG         | ATG         | ATT        | ATT        | ATT        | ATG        | ATG         | ATT        | ATT        |
| <i>Nothochrysa</i> sp.           | ATG         | ATT         | TCG         | ATG         | ATG         | ATG         | ATT        | ATT        | ATT        | ATG        | ATG         | ATT        | ATT        |
| <i>Parankylopteryx</i> sp.       | ATG         | ATT         | ATT         | ATG         | ATG         | ATG         | ATA        |            | ATT        | ATG        | ATG         | ATT        | ATT        |
| Stop codon                       |             |             |             |             |             |             |            |            |            |            |             |            |            |
| <i>Abachrysa eureka</i>          | TAA         | TAA         | T-tRNA      | T-tRNA      | TAA         | TAA         | TAA        | TAA        | TAG        | T-tRNA     | TAA         | T-tRNA     | TAA        |
| <i>Ankylopteryx gracilis</i>     | TAA         | TAA         | T-tRNA      | TAA         | TAA         | T-tRNA      | TAA        | T-tRNA     | T-tRNA     | TA-tRNA    | TAA         | T-tRNA     | TAA        |
| <i>Ankylopteryx octopunctata</i> | TAA         | TAA         | T-tRNA      | T-tRNA      | TAA         | T-tRNA      | TAA        | T-tRNA     | T-tRNA     | TA-tRNA    | TAA         | T-tRNA     | TAA        |
| <i>Apochrysa matsumurae</i>      | TAA         | TAA         | T-tRNA      | T-tRNA      | TAA         | TAA         | TAA        | TAA        | TAG        | T-tRNA     | TAA         | T-tRNA     | TAA        |
| <i>Chrysopa pallens</i>          | TAA         | TAA         | T-tRNA      | T-tRNA      | TAA         | TAA         | TAA        | TAA        | TAG        | T-tRNA     | TAA         | T-tRNA     | TAA        |
| <i>Chrysoperla externa</i>       | TAA         | TAA         | T-tRNA      | T-tRNA      | TAA         | TAA         | TAA        | TAA        | TAG        | TAA        | TAA         | T-tRNA     | T-tRNA     |
| <i>Chrysoperla nipponensis</i>   | TAA         | TAA         | T-tRNA      | T-tRNA      | TAA         | TAA         | TAA        | TAA        | TAG        | T-tRNA     | TAA         | T-tRNA     | TAA        |
| <i>Italochrysa insignis</i>      | TAA         | TAA         | T-tRNA      | T-tRNA      | TAA         | TAA         | TAA        |            | TAG        | T-tRNA     | TAA         | T-tRNA     | TAA        |
| <i>Leucochrysa pretiosa</i>      | TAA         | TAA         | T-tRNA      | T-tRNA      | TAA         | TAA         | TAA        |            | TAG        | T-tRNA     | TAA         | T-tRNA     | TAA        |
| <i>Nothancyla verreauxi</i>      | TAA         | TAA         | T-tRNA      | T-tRNA      | TAA         | TAA         | TAA        | TAA        | TAG        | T-tRNA     | TAA         | T-tRNA     | TAA        |
| <i>Nothochrysa sinica</i>        | TAA         | TAA         | TAA         | T-tRNA      | TAA         | TA-tRNA     | TAA        | TAA        | TAA        | T-tRNA     | TAA         | T-tRNA     | TAA        |
| <i>Nothochrysa</i> sp.           | TAA         | TAA         | TAA         | T-tRNA      | TAA         | TAA         | TAA        | TAA        | TAA        | T-tRNA     | TAA         | T-tRNA     | TAA        |
| <i>Parankylopteryx</i> sp.       | TAA         | TAA         | T-tRNA      | T-tRNA      | TAA         | TAA         | TAA        |            | TAA        | T-tRNA     | TAA         | T-tRNA     | TAA        |

Table S9. Relative synonymous codon usages (RSCUs) of PCGs of *Ankylopteryx gracilis*.

| Codon  | Count | RSCU | Codon  | Count | RSCU |
|--------|-------|------|--------|-------|------|
| UUU(F) | 315   | 1.94 | UCU(S) | 107   | 2.10 |
| UUC(F) | 10    | 0.06 | UCC(S) | 5     | 0.10 |
| UUA(L) | 539   | 1.94 | UCA(S) | 90    | 1.76 |
| UUG(L) | 17    | 0.06 | UCG(S) | 2     | 0.04 |
| UAU(Y) | 185   | 1.90 | UGU(C) | 31    | 1.82 |
| UAC(Y) | 10    | 0.10 | UGC(C) | 3     | 0.18 |
| UAA(*) | 7     | 2.00 | UGA(W) | 97    | 1.92 |
| UAG(*) | 0     | 0.00 | UGG(W) | 4     | 0.08 |
| CUU(L) | 19    | 2.11 | CCU(P) | 76    | 2.39 |
| CUC(L) | 0     | 0.00 | CCC(P) | 7     | 0.22 |
| CUA(L) | 16    | 1.78 | CCA(P) | 43    | 1.35 |
| CUG(L) | 1     | 0.11 | CCG(P) | 1     | 0.03 |
| CAU(H) | 70    | 1.89 | CGU(R) | 24    | 1.71 |
| CAC(H) | 4     | 0.11 | CGC(R) | 0     | 0.00 |
| CAA(Q) | 65    | 2.00 | CGA(R) | 32    | 2.29 |
| CAG(Q) | 2     | 0.00 | CGG(R) | 0     | 0.00 |
| AUU(I) | 395   | 1.94 | ACU(T) | 95    | 2.26 |
| AUC(I) | 13    | 0.06 | ACC(T) | 5     | 0.12 |
| AUA(M) | 244   | 1.90 | ACA(T) | 66    | 1.57 |
| AUG(M) | 13    | 0.10 | ACG(T) | 2     | 0.05 |
| AAU(N) | 233   | 1.94 | AGU(S) | 47    | 1.54 |
| AAC(N) | 7     | 0.06 | AGC(S) | 4     | 0.13 |
| AAA(K) | 83    | 1.93 | AGA(S) | 71    | 2.33 |
| AAG(K) | 3     | 0.07 | AGG(S) | 0     | 0.00 |
| GUU(V) | 69    | 1.74 | GCU(A) | 93    | 2.50 |
| GUC(V) | 2     | 0.05 | GCC(A) | 10    | 0.27 |
| GUA(V) | 85    | 2.14 | GCA(A) | 45    | 1.21 |
| GUG(V) | 3     | 0.08 | GCG(A) | 1     | 0.03 |
| GAU(D) | 58    | 1.87 | GGU(G) | 73    | 1.43 |
| GAC(D) | 4     | 0.13 | GGC(G) | 2     | 0.04 |
| GAA(E) | 77    | 1.97 | GGA(G) | 123   | 2.41 |
| GAG(E) | 1     | 0.03 | GGG(G) | 6     | 0.12 |

\*: Stop codon

Table S10. Relative synonymous codon usages (RSCUs) of PCGs of *Ankylopteryx octopunctata*.

| Codon  | Count | RSCU | Codon  | Count | RSCU |
|--------|-------|------|--------|-------|------|
| UUU(F) | 308   | 1.93 | UCU(S) | 102   | 2.01 |
| UUC(F) | 12    | 0.08 | UCC(S) | 8     | 0.16 |
| UUA(L) | 530   | 1.97 | UCA(S) | 91    | 1.79 |
| UUG(L) | 8     | 0.03 | UCG(S) | 2     | 0.04 |
| UAU(Y) | 182   | 1.86 | UGU(C) | 39    | 2.00 |
| UAC(Y) | 14    | 0.14 | UGC(C) | 0     | 0.00 |
| UAA(*) | 5     | 1.67 | UGA(W) | 97    | 1.96 |
| UAG(*) | 1     | 0.00 | UGG(W) | 2     | 0.04 |
| CUU(L) | 22    | 1.96 | CCU(P) | 84    | 2.69 |
| CUC(L) | 0     | 0.00 | CCC(P) | 4     | 0.13 |
| CUA(L) | 23    | 2.04 | CCA(P) | 37    | 1.18 |
| CUG(L) | 0     | 0.00 | CCG(P) | 0     | 0.00 |
| CAU(H) | 68    | 1.84 | CGU(R) | 23    | 1.61 |
| CAC(H) | 6     | 0.16 | CGC(R) | 0     | 0.00 |
| CAA(Q) | 68    | 2.00 | CGA(R) | 34    | 2.39 |
| CAG(Q) | 0     | 0.00 | CGG(R) | 0     | 0.00 |
| AUU(I) | 390   | 1.92 | ACU(T) | 112   | 2.49 |
| AUC(I) | 17    | 0.08 | ACC(T) | 4     | 0.09 |
| AUA(M) | 249   | 1.88 | ACA(T) | 63    | 1.40 |
| AUG(M) | 16    | 0.12 | ACG(T) | 1     | 0.02 |
| AAU(N) | 217   | 1.92 | AGU(S) | 46    | 1.45 |
| AAC(N) | 9     | 0.08 | AGC(S) | 4     | 0.13 |
| AAA(K) | 82    | 1.86 | AGA(S) | 77    | 2.43 |
| AAG(K) | 6     | 0.14 | AGG(S) | 0     | 0.00 |
| GUU(V) | 66    | 1.76 | GCU(A) | 92    | 2.44 |
| GUC(V) | 0     | 0.00 | GCC(A) | 12    | 0.32 |
| GUA(V) | 82    | 2.19 | GCA(A) | 45    | 1.19 |
| GUG(V) | 2     | 0.05 | GCG(A) | 2     | 0.05 |
| GAU(D) | 64    | 1.88 | GGU(G) | 80    | 1.58 |
| GAC(D) | 4     | 0.12 | GGC(G) | 0     | 0.00 |
| GAA(E) | 72    | 1.95 | GGA(G) | 106   | 2.09 |
| GAG(E) | 2     | 0.05 | GGG(G) | 17    | 0.33 |

\*: Stop codon

Table S11. The count of microsatellite-like sequence in the complete control regions of Chrysopidae.

| microsatellite-like sequence | <i>Ankylopteryx gracilis</i> | <i>Apochrysa matsumurae</i> | <i>Chrysoperla nipponensis</i> | <i>Chrysopa pallens</i> | <i>Chrysoperla externa</i> | <i>Nothochrysa sinica</i> |
|------------------------------|------------------------------|-----------------------------|--------------------------------|-------------------------|----------------------------|---------------------------|
| (TA) <sub>2</sub>            | 125                          | 43                          | 62                             | 95                      | 63                         | 60                        |
| (TA) <sub>3</sub>            | 54                           | 11                          | 19                             | 34                      | 14                         | 25                        |
| (TA) <sub>4</sub>            | 18                           | 5                           | 7                              | 10                      | 5                          | 9                         |
| (TA) <sub>5</sub>            | 10                           | 4                           | 4                              | 4                       | 5                          | 5                         |
| (TA) <sub>6</sub>            | 6                            | 1                           | 3                              | 3                       | 2                          | 4                         |
| (TA) <sub>7</sub>            | 4                            | 1                           | 2                              | 2                       | 0                          | 2                         |
| (TA) <sub>8</sub>            | 3                            | 0                           | 2                              | 1                       | 0                          | 2                         |
| (TA) <sub>9</sub>            | 3                            | 0                           | 0                              | 1                       | 0                          | 1                         |
| (AT) <sub>2</sub>            | 140                          | 36                          | 50                             | 84                      | 61                         | 69                        |
| (AT) <sub>3</sub>            | 45                           | 7                           | 17                             | 24                      | 8                          | 21                        |
| (AT) <sub>4</sub>            | 17                           | 5                           | 8                              | 7                       | 6                          | 10                        |
| (AT) <sub>5</sub>            | 9                            | 3                           | 4                              | 3                       | 5                          | 4                         |
| (AT) <sub>6</sub>            | 5                            | 1                           | 2                              | 2                       | 0                          | 3                         |
| (AT) <sub>7</sub>            | 5                            | 1                           | 2                              | 2                       | 0                          | 2                         |
| (AT) <sub>8</sub>            | 3                            | 0                           | 2                              | 1                       | 0                          | 1                         |
| (AT) <sub>9</sub>            | 3                            | 0                           | 0                              | 1                       | 0                          | 0                         |
| (TAA) <sub>2</sub>           | 43                           | 10                          | 13                             | 12                      | 11                         | 8                         |
| (TAA) <sub>3</sub>           | 8                            | 2                           | 2                              | 1                       | 0                          | 1                         |
| (ATT) <sub>2</sub>           | 10                           | 5                           | 6                              | 7                       | 10                         | 4                         |
| (TAT) <sub>2</sub>           | 9                            | 7                           | 12                             | 15                      | 14                         | 9                         |
| (TAT) <sub>3</sub>           | 2                            | 1                           | 2                              | 4                       | 5                          | 1                         |
| (ATA) <sub>2</sub>           | 31                           | 11                          | 13                             | 16                      | 19                         | 8                         |
| (ATA) <sub>3</sub>           | 10                           | 2                           | 0                              | 1                       | 1                          | 1                         |
| (TTAA) <sub>2</sub>          | 5                            | 2                           | 2                              | 2                       | 3                          | 2                         |
| (AATT) <sub>2</sub>          | 4                            | 6                           | 1                              | 1                       | 3                          | 1                         |
| (TTAAA) <sub>2</sub>         | 1                            | 0                           | 0                              | 1                       | 0                          | 1                         |
| (TTTAAA) <sub>2</sub>        | 2                            | 0                           | 0                              | 0                       | 1                          | 0                         |

Table S12. Nucleotide composition and skews in the complete control regions of Chrysopidae.

| Species                        | T(U)  | C     | A     | G    | Total  | A+T%  | AT-Skew | GC-Skew |
|--------------------------------|-------|-------|-------|------|--------|-------|---------|---------|
| <i>Ankylopteryx gracilis</i>   | 43.93 | 8.15  | 45.45 | 2.46 | 3416.0 | 89.38 | 0.02    | -0.54   |
| <i>Apochrysa matsumurae</i>    | 45.14 | 10.43 | 41.38 | 3.05 | 1409.0 | 86.52 | -0.04   | -0.55   |
| <i>Chrysoperla nipponensis</i> | 41.08 | 8.76  | 45.66 | 4.50 | 1244.0 | 86.74 | 0.05    | -0.32   |
| <i>Chrysopa pallens</i>        | 40.47 | 8.66  | 45.56 | 5.30 | 1905.0 | 86.04 | 0.06    | -0.24   |
| <i>Chrysoperla externa</i>     | 42.80 | 7.97  | 45.02 | 4.21 | 1355.0 | 87.82 | 0.03    | -0.31   |
| <i>Nothochrysa sinica</i>      | 45.79 | 6.29  | 44.45 | 3.46 | 1271.0 | 90.24 | -0.01   | -0.29   |

| rRNA                           | Species                        | T(U)                    | C     | A     | G     | Total  | A+T%  | AT-Skew | GC-Skew |
|--------------------------------|--------------------------------|-------------------------|-------|-------|-------|--------|-------|---------|---------|
| <i>rrnL</i>                    | <i>Abachrysa eureka</i>        | 41.55                   | 6.04  | 41.62 | 10.79 | 1307.0 | 83.17 | 0.00    | 0.28    |
|                                | <i>Ankylopteryx gracilis</i>   | 42.23                   | 5.99  | 41.62 | 10.16 | 1319.0 | 83.85 | -0.01   | 0.26    |
|                                | <i>Apochrysa matsumurae</i>    | 39.57                   | 6.24  | 42.54 | 11.64 | 1314.0 | 82.12 | 0.04    | 0.30    |
|                                | <i>Chrysopa pallens</i>        | 41.25                   | 6.57  | 40.49 | 11.69 | 1309.0 | 81.74 | -0.01   | 0.28    |
|                                | <i>Chrysoperla externa</i>     | 40.00                   | 6.41  | 41.83 | 11.76 | 1310.0 | 81.83 | 0.02    | 0.29    |
|                                | <i>Chrysoperla nipponensis</i> | 40.55                   | 6.50  | 41.09 | 11.86 | 1307.0 | 81.64 | 0.01    | 0.29    |
|                                | <i>Italochrysa insignis</i>    | 40.28                   | 6.30  | 41.89 | 11.53 | 1301.0 | 82.17 | 0.02    | 0.29    |
|                                | <i>Leucochrysa pretiosa</i>    | 41.37                   | 6.06  | 41.37 | 11.20 | 1303.0 | 82.73 | 0.00    | 0.30    |
|                                | <i>Nothancyla verreauxi</i>    | 41.60                   | 6.41  | 40.53 | 11.45 | 1310.0 | 82.14 | -0.01   | 0.28    |
|                                | <i>Nothochrysa sinica</i>      | 41.09                   | 5.99  | 41.93 | 10.99 | 1319.0 | 83.02 | 0.01    | 0.29    |
|                                | <i>Nothochrysa</i> sp.         | 40.40                   | 6.04  | 42.54 | 11.02 | 1307.0 | 82.94 | 0.03    | 0.29    |
|                                | <i>Parankylopteryx</i> sp.     | 41.50                   | 5.99  | 42.03 | 10.47 | 1318.0 | 83.54 | 0.01    | 0.27    |
|                                | <i>rrnS</i>                    | <i>Abachrysa eureka</i> | 41.47 | 6.72  | 39.92 | 11.89  | 774.0 | -0.02   | 18.60   |
| <i>Ankylopteryx gracilis</i>   |                                | 40.77                   | 6.32  | 41.55 | 11.35 | 775.0  | 0.01  | 17.68   | 0.28    |
| <i>Apochrysa matsumurae</i>    |                                | 39.43                   | 6.70  | 40.98 | 12.89 | 776.0  | 0.02  | 19.59   | 0.32    |
| <i>Chrysopa pallens</i>        |                                | 41.21                   | 6.93  | 40.31 | 11.55 | 779.0  | -0.01 | 18.49   | 0.25    |
| <i>Chrysoperla externa</i>     |                                | 40.41                   | 7.08  | 40.67 | 11.84 | 777.0  | 0.00  | 18.92   | 0.25    |
| <i>Chrysoperla nipponensis</i> |                                | 39.69                   | 7.22  | 40.46 | 12.63 | 776.0  | 0.01  | 19.85   | 0.27    |
| <i>Italochrysa insignis</i>    |                                | 40.88                   | 6.73  | 40.75 | 11.64 | 773.0  | 0.00  | 18.37   | 0.27    |
| <i>Nothochrysa sinica</i>      |                                | 39.92                   | 6.89  | 41.33 | 11.86 | 784.0  | 0.02  | 18.75   | 0.27    |
